# Supplementary material
Source: HighWire-hosted journal article supplement (https://bmjopen.bmj.com/content/9/7/e028577)
Supplement: inline-supplementary-material-4 [file inline-supplementary-material-4.pdf]

IRAS 236877

|                                                                                                                                                                                                                                                               |  |                                                                                                                                                                       |
|---------------------------------------------------------------------------------------------------------------------------------------------------------------------------------------------------------------------------------------------------------------|--|-----------------------------------------------------------------------------------------------------------------------------------------------------------------------|
| <p><b>XPAND</b></p> <p><b>Enhancing Photoprotection Activities - New Directions</b></p> <p>Xeroderma Pigmentosum National Service</p> <p>2<sup>nd</sup> Floor, South Wing</p> <p>St Thomas' Hospital</p> <p>Westminster Bridge Road</p> <p>London SE1 7EH</p> |  |   |
|---------------------------------------------------------------------------------------------------------------------------------------------------------------------------------------------------------------------------------------------------------------|--|-----------------------------------------------------------------------------------------------------------------------------------------------------------------------|

## Feedback Questionnaire

**We are interested in your opinion of the XPAND programme. Your views will contribute to development of the programme for people newly diagnosed with XP. We are interested in your views, there are no right or wrong answers.**

**Please tick the box to show how much you agree or disagree with the following statements about the XPAND programme.**

1. Overall the programme was.....

|                    | 1<br>Strongly disagree | 2 | 3 | 4 | 5<br>Completely agree |
|--------------------|------------------------|---|---|---|-----------------------|
| Relevant to me     |                        |   |   |   |                       |
| Interesting        |                        |   |   |   |                       |
| Helpful            |                        |   |   |   |                       |
| Easy to understand |                        |   |   |   |                       |
| Too long           |                        |   |   |   |                       |
| Too short          |                        |   |   |   |                       |

|          |
|----------|
| Comments |
|----------|

Supplementary file 4. Intervention Feedback Questionnaire

Please give us reasons for your answers and say if there is anything you'd like us to change....

2. How helpful did you find the different parts of the programme?

|                                                 | 1<br>Not at all<br>helpful | 2 | 3 | 4 | 5<br>Very helpful |
|-------------------------------------------------|----------------------------|---|---|---|-------------------|
| Face to face meeting with XPAND team member     |                            |   |   |   |                   |
| Telephone or skype calls with XPAND team member |                            |   |   |   |                   |
| Printed materials                               |                            |   |   |   |                   |
| Text messages                                   |                            |   |   |   |                   |

Comments

Please explain why you found parts helpful or not helpful

3. Please tick the box to show how much you agree or disagree with the following statements about the XPAND programme?

*The programme helped me to improve my UV protection*

|                   |   |   |   |   |   |                  |
|-------------------|---|---|---|---|---|------------------|
| Strongly disagree | 1 | 2 | 3 | 4 | 5 | Completely agree |
|-------------------|---|---|---|---|---|------------------|

Comments

Tell us what you are doing differently? If nothing has changed please write "no change".

4. *The programme has made living with XP easier in other ways (e.g. feeling generally more confident or closer to family and friends)*

|                   |   |   |   |   |   |                  |
|-------------------|---|---|---|---|---|------------------|
| Strongly disagree | 1 | 2 | 3 | 4 | 5 | Completely agree |
|-------------------|---|---|---|---|---|------------------|

Comments

Could you tell us how? If nothing has changed please write "no change".

5. Overall the programme has changed.....

|                                                           | 1<br>Strongly<br>disagree | 2 | 3 | 4 | 5<br>Completely<br>agree |
|-----------------------------------------------------------|---------------------------|---|---|---|--------------------------|
| My motivation to protect                                  |                           |   |   |   |                          |
| My confidence in managing protection                      |                           |   |   |   |                          |
| My knowledge                                              |                           |   |   |   |                          |
| My routines in managing protection                        |                           |   |   |   |                          |
| My ways of coping when life gets in the way of protection |                           |   |   |   |                          |
| How my friends and family support me                      |                           |   |   |   |                          |

Comments

Can you tell us how these things have changed? If nothing has changed please write “no change”.

6. Would you recommend taking part in XPAND to other people with XP?

Yes

No

Please add any other comments here

Comments

**THANK YOU VERY MUCH**
