# Supplementary material
Source: HighWire-hosted journal article supplement (https://bmjopen.bmj.com/content/9/7/e028577)
Supplement: inline-supplementary-material-5 [file inline-supplementary-material-5.pdf]

**XPAND**  
**Enhancing Photoprotection Activities - New Directions**  
**Service use and Financial costs of XP to you and**  
**your family in the last 6 months**  
**Xeroderma Pigmentosum National Service**  
2<sup>nd</sup> Floor, South Wing  
St Thomas' Hospital  
Westminster Bridge Road  
London SE1 7EH



These questions are about the services that you have accessed and the financial cost that the XP causes for you and your family. It is fine if you make your best guess for questions where you are not sure of the answer.

1. In the last 6 months, have you attended the XP clinic at Guy's and St Thomas' hospital? Please complete the following sentence:

a) I have attended the clinic \_\_\_\_ times in the last 6 months

If you did not attend the XP clinic in the last 6 months, go to question 2.

If you have attended the clinic in the last 6 months:

b) How long did the journey from home to the clinic take? \_\_\_\_ hours \_\_\_\_ minutes

c) Did you have to spend the night away from home in order to visit the clinic?

Yes, I stayed in hospital

Yes, but not in hospital

No

d) Which specialists do you recall seeing on your visit(s) to the XP clinic? Please tick yes or no for each specialist

| Specialist      | Yes, I saw this person | No, I did not see this person |
|-----------------|------------------------|-------------------------------|
| Dermatologist   |                        |                               |
| Ophthalmologist |                        |                               |
| Neurologist     |                        |                               |
| Geneticist      |                        |                               |
| Psychologist    |                        |                               |

Supplementary file 5. Service Use Questionnaire

|                  |  |  |
|------------------|--|--|
| Specialist Nurse |  |  |
| Plastic Surgeon  |  |  |

2. Please complete the following sentence:

In the last 6 months, I have been to Accident and Emergency because of my XP \_\_\_ times.

3. Please give details of any hospital outpatient appointments you have had in the last 6 months because of your XP. Do not include trips to the XP clinic at Guy's and St Thomas' here.

| Speciality      | Number of XP related visits in the last 6 months | If you paid for this service, roughly how much did it cost per visit? | Roughly how long did it take to travel to the appointment? |
|-----------------|--------------------------------------------------|-----------------------------------------------------------------------|------------------------------------------------------------|
| Dermatology     |                                                  |                                                                       | ___ hours __ minutes                                       |
| Ophthalmology   |                                                  |                                                                       | ___ hours __ minutes                                       |
| Neurology       |                                                  |                                                                       | ___ hours __ minutes                                       |
| Paediatrics     |                                                  |                                                                       | ___ hours __ minutes                                       |
| Plastic Surgery |                                                  |                                                                       | ___ hours __ minutes                                       |
| Psychologist    |                                                  |                                                                       | ___ hours __ minutes                                       |

4. What surgery you have had in the LAST 6 MONTHS? (day or clinic surgery - where you did not stay in hospital overnight)

| Type of surgery                                                       | Approximate number of surgeries | If you paid for this service, approximately how much did it cost per episode of surgery? | Roughly how long did it take to travel for the surgery? |
|-----------------------------------------------------------------------|---------------------------------|------------------------------------------------------------------------------------------|---------------------------------------------------------|
| Skin biopsy                                                           |                                 |                                                                                          | ___ hours __ minutes                                    |
| Surgery to the skin                                                   |                                 |                                                                                          | ___ hours __ minutes                                    |
| Surgery to the eyes                                                   |                                 |                                                                                          | ___ hours __ minutes                                    |
| Other XP related surgery<br><br>What sort of surgery was it?<br>_____ |                                 |                                                                                          | ___ hours __ minutes                                    |

**5. Please complete the following sentence.**

**In the last 6 months, I have been admitted to hospital and stayed overnight \_\_\_\_ times because of my XP. In this time, I spent a total of \_\_\_\_ nights in hospital.**

**6. In the last 6 months, which of these services have you visited or been visited at home by, because of your XP?**

|                                                              | <b>Number of appointments at surgery or clinic</b> | <b>Number of home visits</b> | <b>If you paid, approximately how much did it cost per visit?</b> | <b>How long did it take to travel for the appointment each time if it was not at home?</b> |
|--------------------------------------------------------------|----------------------------------------------------|------------------------------|-------------------------------------------------------------------|--------------------------------------------------------------------------------------------|
| General practitioner                                         |                                                    |                              |                                                                   | ___ hours __ minutes                                                                       |
| Nurse                                                        |                                                    |                              |                                                                   | ___ hours __ minutes                                                                       |
| Physiotherapist                                              |                                                    |                              |                                                                   | ___ hours __ minutes                                                                       |
| Psychologist ,<br>Counsellor or<br>Psychotherapist           |                                                    |                              |                                                                   | ___ hours __ minutes                                                                       |
| 'Alternative'<br>medicine or<br>'complementary'<br>therapist |                                                    |                              |                                                                   | ___ hours __ minutes                                                                       |
| Occupational<br>therapist                                    |                                                    |                              |                                                                   | ___ hours __ minutes                                                                       |
|                                                              | <b>Number of appointments at surgery or clinic</b> | <b>Number of home visits</b> | <b>If you paid, approximately how much did it cost per visit?</b> | <b>How long did it take to travel for the appointment each time if it was not at home?</b> |

Supplementary file 5. Service Use Questionnaire

|                               |  |  |  |                      |
|-------------------------------|--|--|--|----------------------|
| Social worker                 |  |  |  | ___ hours __ minutes |
| Home help or home care worker |  |  |  | ___ hours __ minutes |
| Self-help or support group    |  |  |  | ___ hours __ minutes |

**7. Please list any tests you remember that you have had done in the LAST 6 MONTHS because of your XP**

| <b>Service</b>                                            | <b>How many times?</b> | <b>If you paid, approximately how much did it cost?</b> |
|-----------------------------------------------------------|------------------------|---------------------------------------------------------|
| MRI (Magnetic Resonance Image) brain scan                 |                        |                                                         |
| Audiometry                                                |                        |                                                         |
| Nerve testing (nerve conduction or EMG test)              |                        |                                                         |
| Blood test                                                |                        |                                                         |
| Other investigations / tests<br>What was it?<br><br>..... |                        |                                                         |

**8. In the last 6 months, have you received help from friends or relatives with any of the following tasks, as a result of your XP?**

| Type of help                                                  | Please Circle | Approximate number of hours they help you in a week |
|---------------------------------------------------------------|---------------|-----------------------------------------------------|
| Child Care<br>(circle 'No' if you have no children)           | No    Yes     |                                                     |
| Personal care<br>(for example washing, dressing)              | No    Yes     |                                                     |
| Help in the house<br>(for example cooking or cleaning)        | No    Yes     |                                                     |
| Help outside the house<br>(for example shopping or transport) | No    Yes     |                                                     |
| Going with you to medical appointment                         | No    Yes     |                                                     |

**9. If you answered yes to any help in the previous question, have your helper(s) taken any time out of work or education to help you as a result of your XP?**

**If there are part-days to consider, assume that 1 day = 8 hours.**

\_\_\_\_\_ days taken off from work in the last 6 months

\_\_\_\_\_ days taken off from education in the last 6 months

**10. What is your employment status today? Please tick the one that best describes your situation**

|                                                                             |  |
|-----------------------------------------------------------------------------|--|
| Paid employment - full-time                                                 |  |
| Paid employment – part-time (working 30 or fewer hours per week on average) |  |
| Unemployed – registered unemployed, available and looking for work          |  |
| Unemployed – unable to work due to illness                                  |  |
| Unpaid voluntary work                                                       |  |

Supplementary file 5. Service Use Questionnaire

|                   |  |
|-------------------|--|
| Student           |  |
| Retired           |  |
| Housewife/husband |  |

11. If you have been in education in the last 6 months, approximately how many days have you been off due to health problems? \_\_\_\_\_ days

12. If you have been in work in the last 6 months, approximately how many days have you been off due to health problems? \_\_\_\_\_ days

13. Please circle the appropriate answer:

The impact of XP on the household finances (for example on what you can spend on food, clothes, and holidays) has been

Very small          Small          Moderate          Large          Very large

14. Approximately how much would you estimate that you / your household has paid in the last 6 months for these items? If you paid for items that were a one-off cost longer than 6 months ago, please record these in the "one-off cost" column (*take a best and approximate guess, and do not spend too long on this – we realise it is not possible to be completely accurate for this!*) :

|                                                      | Approximate cost in last 6 months to you | A one-off cost |
|------------------------------------------------------|------------------------------------------|----------------|
| Sunscreen creams                                     |                                          |                |
| UV protective window films                           |                                          |                |
| Other house or car adaptations to protect against UV |                                          |                |
| UV visor                                             |                                          |                |
| UV protective clothes                                |                                          |                |
| Glasses                                              |                                          |                |
| Vitamin D tablets                                    |                                          |                |
| UV meter                                             |                                          |                |

**15. Please list any medication that you have taken in the last 6 months, because of your XP**

| <b>Medication name and strength</b> | <b>Length of time that you took /<br/>have taken the medication for<br/>out of the last 6 months</b> |
|-------------------------------------|------------------------------------------------------------------------------------------------------|
|                                     | ___ months ___ weeks ___ days                                                                        |
|                                     | ___ months ___ weeks ___ days                                                                        |
|                                     | ___ months ___ weeks ___ days                                                                        |
|                                     | ___ months ___ weeks ___ days                                                                        |

|                                                         |  |
|---------------------------------------------------------|--|
| <b>16. What is the date today?<br/>(day/month/year)</b> |  |
|---------------------------------------------------------|--|

**THANK YOU VERY MUCH FOR COMPLETING OUR QUESTIONNAIRE.**
